# Supplementary material for: Butterfly eyespot organiser: in vivo imaging of the prospective focal cells in pupal wing tissues
Source: PubMed Central journal article supplement (PMC5240560; doi:10.1038/srep40705), 2017-01-17
Supplement: srep40705-s6.pdf [file srep40705-s6.pdf]

*Scientific Reports*

Supplementary Information

**Butterfly eyespot organiser: *in vivo* imaging of the prospective focal cells in pupal wing tissues**

**Mayo Iwasaki, Yoshikazu Ohno & Joji M. Otaki**

The BCPH Unit of Molecular Physiology, Department of Chemistry, Biology and Marine Science, University of the Ryukyus, Okinawa 903-0213, Japan

Correspondence and requests for materials should be addressed to J.M.O.  
([otaki@sci.u-ryukyu.ac.jp](mailto:otaki@sci.u-ryukyu.ac.jp))

**Supplementary Video 1**

**Supplementary Video 2**

**Supplementary Video 3**

**Supplementary Video 4**

**Supplementary Video 5**

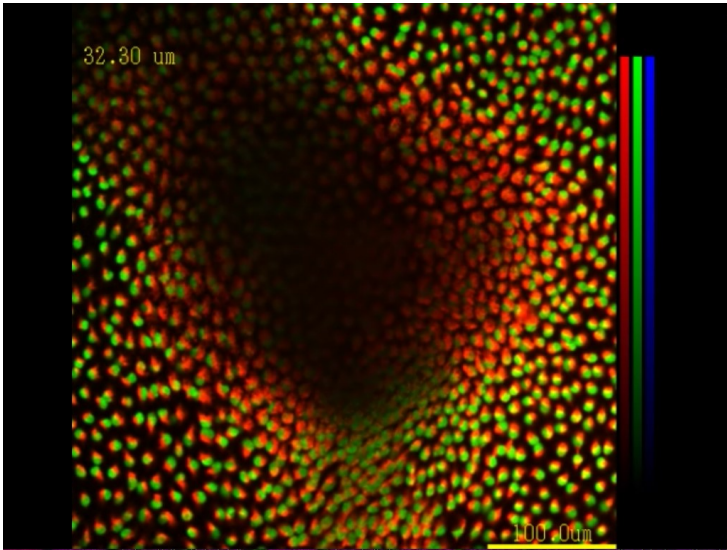

**Supplementary Video 1.** Focal indentation stained with SYBR Green I for nuclei and MitoTracker Red for mitochondria.

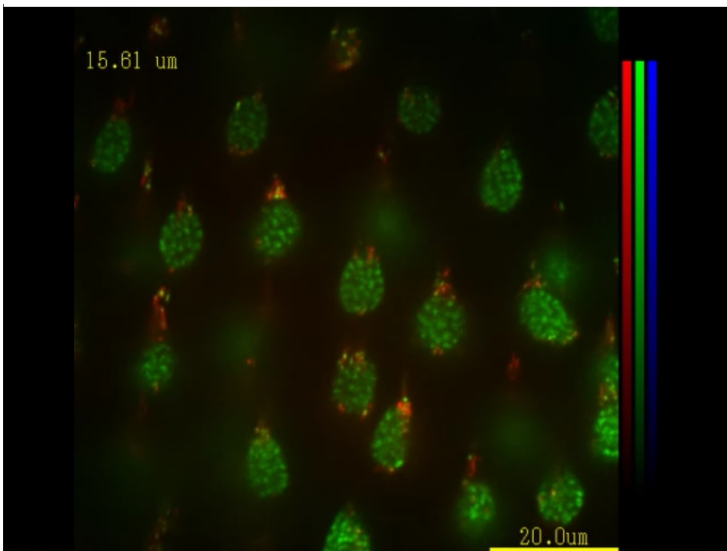

**Supplementary Video 2.** Basal region stained with SYBR Green I for nuclei and MitoTracker Red for mitochondria.

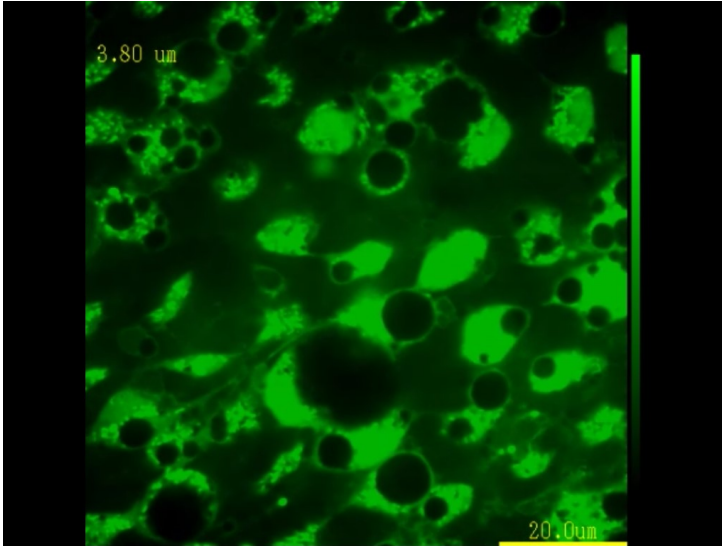

**Supplementary Video 3.** Focal region stained with CFSE for cytoplasm.

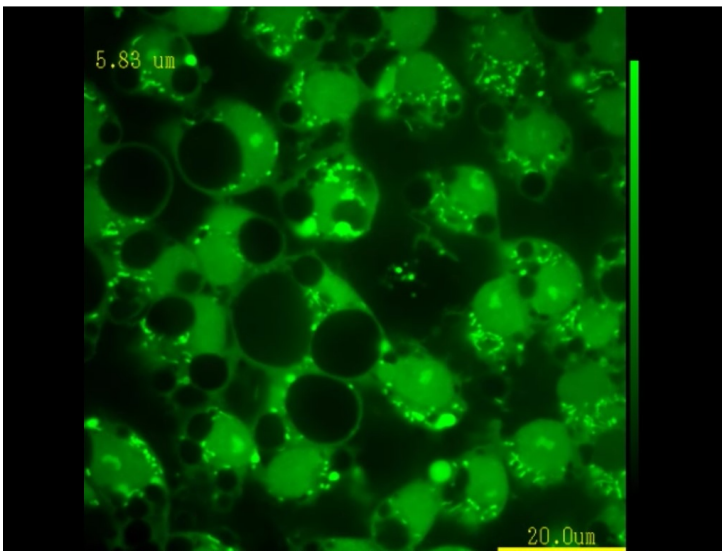

**Supplementary Video 4.** Adjacent region stained with CFSE for cytoplasm.

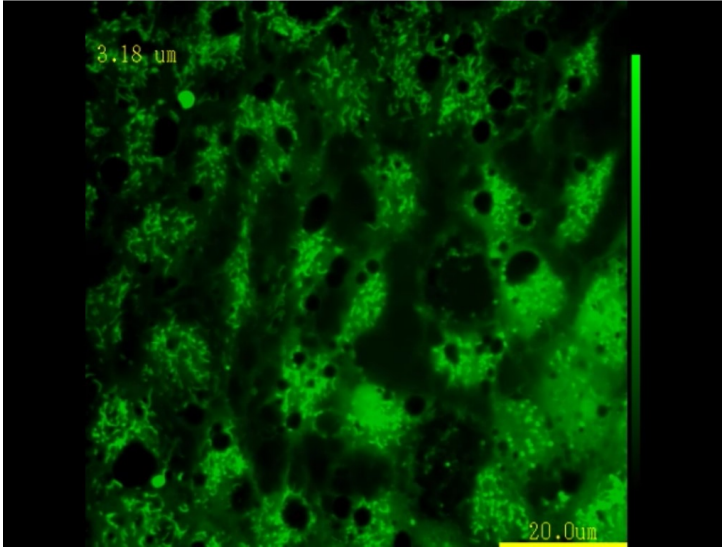

**Supplementary Video 5.** Basal region stained with CFSE for cytoplasm.
